# Supplementary material for: Re-thinking Indoor Humidity Control Strategies: The potential of additive manufacturing with low-carbon, super hygroscopic materials.
Source: Research Square preprint supplement (doi:10.21203/rs.3.rs-3427939/v1), 2023-11-14
Supplement: Supplementary file 1 [file 38114c63e17c57da2c183653.xlsx]

## Sheet: Ecoinvent values
LCI values
	'market for sand - CH - sand'		0.00506	kg CO2-Eq/kg
	'market for calcined clay production - GLO - calcined clay'		0.273	kg CO2-Eq/kg
	'market for inert waste, for final disposal - RoW - inert waste, for final disposal'		0.00955	kg CO2-Eq/kg
	'market for water, deionised - CH - water, deionised'		0.000402	kg CO2-Eq/kg
	'market for potassium hydroxide production - GLO - potassium hydroxide'		2.68	kg CO2-Eq/kg
	'market for activated silica production - GLO - sodium sulfate, anhydrite'		0.325	kg CO2-Eq/kg
	'market for Clay - Row'		0.01109	kg CO2-Eq/kg
	'market cement, Portland- Ch- Cement & concrete'		0.73938	kg CO2-Eq/kg
	'market for Lime, packed - CH - Minerals, cement & concrete'		0.021301	kg CO2-Eq/kg
	'market for reinforcing steel - GLO - reinforcing steel'		2.2	kg CO2-Eq/kg
	Energy consumptions of 3D printing
	Electricity, medium voltage (CH) | market for | Alloc Def, U		0.038878	kg CO2-Eq/kwh
	Values from literature:
	1. Dry mixer (Powder)		0.004	kWh/kg		1. From "How to improve the cradle-to-gate environmental and economic sustainability in limebased construction materials? Answers from a real-life case-study Agustin Laveglia" https://doi.org/10.1016/j.dibe.2023.100186												677.201
	2. Electricity consumption
	(202 kWh/4.46 m3 functional unit)-->		45.2915	kWh/m3		2. and 3. From "Life cycle assessment of 3D printing geopolymer concrete An ex-ante study" https://doi.org/10.1111/jiec.12930
	3. Machines consumption
	(11.5 kWh/4.46 m3 functional unit)-->		2.57848	kWh/m3
Mix design
	Mix design Geopolymer composites
			kg per kg Product	kg per m3 Product			Density (g/cm3)	1.812
	sand (gneiss)		0.561	1016.53
	metakaolin		0.1403	254.224
	Sodium silicate:
	deionized water		0.1583	286.84
	KOH		0.076	137.712
	silica gel		0.0643	116.512
	tot		0.9999	1811.82
	Mix design Earth Plaster
			kg per kg Product	kg per m3 Product			Density (g/cm3)	1.743
	sand		0.29	512.647
	clay		0.58	1025.29
	deionized water		0.116	205.059
			0.986	1743
	Mix design Lime-Cement Plaster ( https://doi.org/10.3390/infrastructures6010011)
			kg per kg Product	kg per m3 Product			Density (g/cm3)	1.88
	sand		0.699333	1314.75
	Air Lime		0.0535758	100.722
	Cement		0.0923636	173.644
	deionized water		0.140909	264.909
	tot		0.986182	1854.02
	Embodied emissions in geopolymer composites 1m3 (kg CO2-Eq)
		3D printed geopolymer tiles	Geopolymer plaster (Quarry waste)	lime-cement mortar	earth
	Primary sand			6.65262	2.59399
	metakaolin	69.403	69.403
	Silica gel	37.8663	37.8663
	Potassium hydroxide	369.068	369.068
	Water	0.11531	0.11531	0.106493	0.0824336
	Clay				11.3705
	Air lime			2.14549
	Cement			195.868
	Dry mix of powder	0.281788	0.281788	0.281788	0.281788
	Electricity consumption	1.76084
	Machines consumption	0.100246
	avoided landfill	-9.70788	-9.70788
	Total:	468.888	467.027	205.055	14.3287
	Embodied emissions in geopolymer composites 1kg (kg CO2-Eq)
		3D printed geopolymer tiles	Geopolymer plaster (Quarry waste)	cement-lime	earth
	Primary sand			0.00353863	0.00148824
	metakaolin	0.0383019	0.0383019
	Silica gel	0.0208975	0.0208975
	Potassium hydroxide	0.20368	0.20368
	Water	6.36366e-05	6.36366e-05	5.66455e-05	4.72941e-05
	Clay				0.00652353
	Air lime			0.00114122
	Cement			0.104185
	Dry mix of powder	0.000155512	0.000155512	0.000149887	0.000161668
	Electricity consumption	0.000971767
	Machines consumption	5.53234e-05
	avoided landfill	-0.00535755	-0.00535755
	Total:	0.258768	0.257741	0.109072	0.00822073
	Embodied emissions in geopolymer composites 1m2 coveed with 4cm (kg CO2-Eq)
		3D printed geopolymer tiles	Geopolymer plaster (Quarry waste)*	lime-cement mortr	earth
	Total:	7.76218	18.6811	8.20219	0.573149
			*Contribution of metal fastening: 0.37 kg of fastening per m2 of tiles applied
		6.94718	18.6811	8.20219	0.573149
			1m2
	1 m2 of 3DP geopolymer composite TYLES 4cm thick	0.0148163	m3/m2
		26.8471	kg/m2
	geopolymer plaster 4cm: kg/m2	0.04	m3/m2
		72.48	kg/m2
	cement-lime plaster 4cm: kg/m2	0.04	m3/m2
		75.2	kg/m2
	earth plaster	0.04	m3/m2
		69.72	kg/m2
					.
	GEOPOLYMER TILE GEOMETRY
	V/covered A	0.370408
	Aexp/Acovered	4.3017
Dehumidification
			Mechanical system 1
			0.6	kg/h
			1.1	kW/l
			1.83333	kW/l
			https://www.puravent.co.uk/pub/media/resources/brand-pdfs/DT210_DT400_DT450_brochure_page.pdf
			16.5	kg
			Mechanical system 2
			5.33333	kg/h
			1.4	kW/l
			0.2625	kW/l
			https://ek-teknikk.no/wp-content/uploads/2016/07/ENG_Technical-Manual_ID-SP-rev06.pdf
			100	kg
			Averages:
			2.96667	kg/h
			1.25	kW/l
			1.04792	kW/l
			58.25	kg
